# **S-EBM: Generalising event-based modelling of disease progression for simultaneous events**

Parker CS<sup>1</sup>⊥, Oxtoby NP<sup>1</sup>, Alexander DC<sup>1</sup>, Zhang H<sup>1</sup> for the Alzheimer's Disease Neuroimaging Initiative<sup>2</sup>

<sup>1</sup> Centre for Medical Image Computing, Department of Computer Science, UCL, London, UK

<sup>2</sup> Data used in preparation of this article were obtained from the Alzheimer's Disease Neuroimaging Initiative (ADNI) database ([adni.loni.usc.edu](http://adni.loni.usc.edu)). As such, the investigators within the ADNI contributed to the design and implementation of ADNI and/or provided data but did not participate in analysis or writing of this report. A complete listing of ADNI investigators can be found at:

[http://adni.loni.usc.edu/wp-content/uploads/how\\_to\\_apply/ADNI\\_Acknowledgement\\_List.pdf](http://adni.loni.usc.edu/wp-content/uploads/how_to_apply/ADNI_Acknowledgement_List.pdf)

⊥ Corresponding author: [christopher.parker@ucl.ac.uk](mailto:christopher.parker@ucl.ac.uk). University College London, Centre for Medical Image Computing, 90 High Holborn, Floor 1, London, UK, WC1V6LJ

## 35 **Abstract**

36 Estimating the temporal evolution of biomarker abnormalities in disease informs  
37 understanding of early disease processes and facilitates subject staging, which may  
38 augment the development of early therapeutic interventions and provide personalised  
39 treatment tools. Event-based modelling of disease progression (EBM) is a data-driven  
40 technique for inferring a sequence of biomarker abnormalities, or events, from cross-  
41 sectional or short-term longitudinal datasets and has been applied to a variety of different  
42 diseases, including Alzheimer's disease. Conventional EBM (C-EBM) assumes the  
43 sequence of biomarker abnormalities occurs in series, with one biomarker event per disease  
44 progression stage. However, events may occur simultaneously, for example due to the  
45 presence of shared causal factors, a property which cannot be inferred from C-EBM. Here  
46 we introduce simultaneous EBM (S-EBM), a generalisation of C-EBM to enable estimation of  
47 simultaneous events. S-EBM can estimate a wider range of sequence types than C-EBM  
48 while being fully backward compatible with the original model. Using simulated data, we  
49 firstly demonstrate the inability of C-EBM to infer simultaneous events. We next assess the  
50 accuracy of S-EBM against ground truth data and subsequently demonstrate a real-world  
51 example application to sequence disease progression in Alzheimer's disease. Simulations  
52 show that C-EBM can not discern serial events with high biomarker variance from  
53 simultaneous events, preventing its use for inferring simultaneous events. S-EBM has high  
54 estimation accuracy against ground truth for a range of sequence types (fully simultaneous,  
55 partially simultaneous, serial), number of biomarkers and biomarker variances. When  
56 applied to Alzheimer's disease biomarker data from ADNI, S-EBM estimated a sequence  
57 where events within sets of biomarker domains occur simultaneously. Accumulation of total  
58 and phosphorylated tau in cerebrospinal fluid; performance on RAVLT, ADAS-Cog and  
59 MMSE cognitive test scores; and volumetric decline in temporal regional brain volumes,  
60 were better described as groups of simultaneous events rather than a single set of serial  
61 events (likelihood ratio  $\gg 1,000$ ). Furthermore, C-EBM may be confidently incorrect  
62 regarding the serial ordering. S-EBM may be applied to prospective and retrospective  
63 biomarker data to refine understanding of disease progression and generate new  
64 hypotheses regarding disease aetiology and spread.

65  
66  
67  
68  
69  
70

## 71 **1. Introduction**

72 Estimating the temporal progression of biomarker abnormalities throughout the  
73 course of a disease identifies biomarkers of early disease, which generates hypotheses  
74 regarding disease aetiology and spread; and facilitates subject staging, which may aid the  
75 development of therapeutic interventions and personalised treatment.

76 Disease progression has been previously estimated using hypothesis-driven  
77 approaches following literature review or post-mortem examination. For example, the Jack  
78 curves (Jack Jr. et al 2010) describe the evolution of biomarkers abnormalities in  
79 Alzheimer's disease (AD), and Braak stages were derived from post-mortem examination of  
80 AD patients (Braak, H & Braak, E 1991). Although these approaches are informative, they  
81 are qualitative in nature. Data-driven approaches are needed for objective assessment of  
82 disease spread. In the ideal scenario the temporal trajectory of different biomarkers is  
83 derived from longitudinal data acquired throughout the disease course. However, in practice  
84 cross-sectional or short-term longitudinal data are the predominant type of biomarker data  
85 available. There is therefore a need for approaches that estimate disease progression from  
86 such data.

87 Event-based modelling of disease progression (EBM) is a data-driven approach that  
88 estimates the evolution of biomarker abnormalities from cross-sectional or short-term  
89 longitudinal data (Fonteijn et al 2012). EBM has been applied to estimate progression of  
90 biomarker abnormality in a variety of diseases, including AD (Young et al 2014),  
91 Huntington's disease (Wijeratne et al 2018), multiple sclerosis (Eshaghi et al 2018) and  
92 amyotrophic lateral sclerosis (Gabel et al 2020).

93 Underlying the conventional EBM (C-EBM) approach (Fonteijn et al 2012), as well as  
94 its recent variants, is the assumption that biomarker abnormalities are ordered serially, i.e.  
95 no two biomarkers may become abnormal concurrently. However, biomarker abnormalities  
96 may occur simultaneously when they are driven by common causative factors, or be better  
97 approximated as simultaneous than as serial when the difference between their temporal  
98 trajectories is unresolvably small. Such simultaneous events cannot be inferred from C-EBM  
99 as they are excluded from the model by construction. The positional uncertainty that C-EBM  
100 estimates may suggest the presence of simultaneous events, but can also simply reflect  
101 high variance in biomarker measurements. By not accounting for simultaneous events, C-  
102 EBM may incorrectly estimate the sequence and patient staging, limiting its ability to impact  
103 disease understanding and therapeutic development.

104 To overcome this limitation, we introduce simultaneous EBM (S-EBM), a  
105 generalisation of C-EBM that can estimate a sequence containing simultaneous events. By  
106 allowing simultaneous events, a wider range of disease progression models can be

107 estimated from any given biomarker data input. In this study, we demonstrate C-EBM's  
108 inability to infer simultaneous events, describe the theory of S-EBM and sequence  
109 estimation, evaluate the performance of S-EBM against ground truth synthetic data, and  
110 provide an example application to sequence evolution of biomarker abnormalities in AD. We  
111 show that S-EBM can reliably estimate sequences containing simultaneous events and that  
112 such a sequence can better explain the evolution of AD biomarker abnormality.

113

## 114 **2. Theory**

### 115 **2.1. Generalising the event-based model**

#### 116 *2.1.1. Overview of the conventional event-based model*

117 C-EBM represents the progression of biomarker abnormalities in disease by a  
118 sequence, which is an ordered list that encodes the temporal order in which each biomarker  
119 undergoes a transition from a normal state to an abnormal state. These transitions, termed  
120 events, demarcate the disease progression stages, from which subjects are assumed to be  
121 uniformly sampled.

122 A key assumption of C-EBM is monotonicity of biomarker evolution i.e. that  
123 biomarkers transition to an abnormal state but do not subsequently revert. Thus, in the first  
124 stage all biomarkers are in a normal state and at each subsequent stage a biomarker  
125 transitions to an abnormal state, until the final stage where all biomarkers are abnormal. A  
126 further key assumption of C-EBM is that all subjects are sampled from the same disease  
127 trajectory. In other words, the set of biomarker measurements for a given subject provides a  
128 snapshot of the disease at a particular stage. Furthermore, the subjects are assumed to be  
129 sampled from a single disease progression sequence.

130 C-EBM seeks the sequence with highest posterior probability given the observed  
131 biomarker measurements. By assuming an equal prior probability for all possible sequences,  
132 this becomes equivalent to the sequence likelihood i.e. the probability of the data given the  
133 sequence. As the sequence prescribes the set of events for each disease stage, then given  
134 the probability density functions associated with each biomarkers' possible event state (see  
135 section 2.4. Event distributions), then the likelihood of the sequence can be evaluated and  
136 subsequently maximised across sequence samples. A summary of sequence estimation is  
137 shown in Fig. 1.

138

139

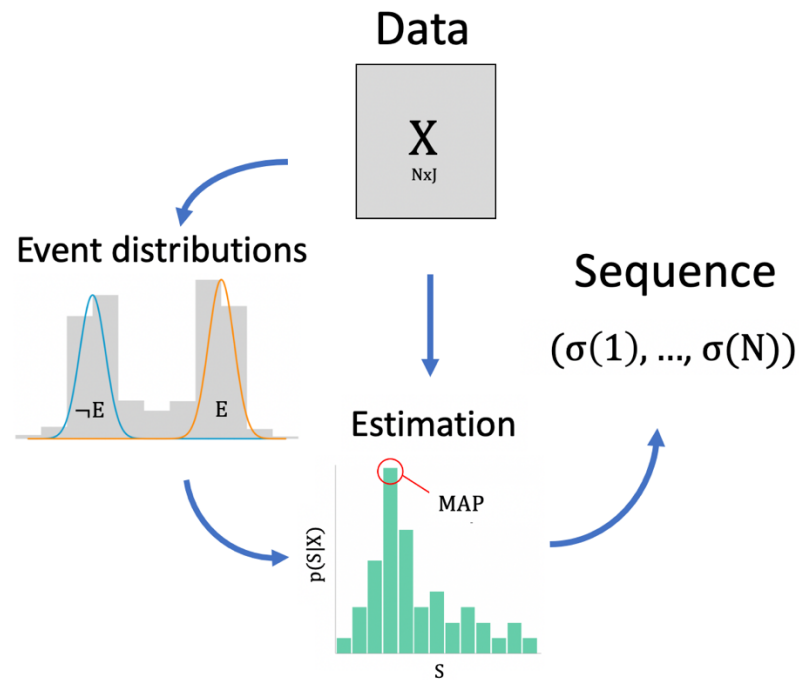

140

141 **Figure 1.** Overview of sequence estimation in C-EBM. C-EBM finds the sequence,  $S$ , with  
 142 maximum posterior probability given the biomarker measurements,  $X$ . Given an equal prior  
 143 probability of each sequence, this is equivalent to the maximum likelihood sequence.

144

145 The sequence likelihood is equal to the joint probability of observing the set of  
 146 subjects' data. Given the input data matrix  $X$ , an  $N$ -by- $J$  matrix containing  $N$  biomarker  
 147 measurements for  $J$  subjects, and assuming that each subject is sampled independently,  
 148 then the likelihood of the sequence,  $S$ , is the product of subject probabilities:

$$149 \quad p(X|S) = \prod_{j=1}^J p(X_j|S) \quad (1)$$

150 where  $X_j$  is a column of  $X$  corresponding to the  $N$  biomarker measurements for subject  $j$ .

151 As described below, the formulation of  $p(X_j|S)$  makes reference to the set of event  
 152 states' distributions at each disease stage. As these events are defined by  $S$ , the formulation  
 153 of  $p(X_j|S)$  depends on the specific form of  $S$ . Next, we describe how the sequence is  
 154 specified and likelihood formulation derived for C-EBM, which assumes the events occur in  
 155 series, before describing the generalisation of the sequence and likelihood formulation for  
 156 simultaneous events.

157

### 158 2.1.2. Conventional event-based model: sequence specification and likelihood function

159 C-EBM specifies the sequence as a permutation of the biomarker indices  $1, \dots, N$ .  
 160 Each element of  $S$ ,  $s(i)$ , holds the biomarker event occurring at the  $i$ 'th disease progression  
 161 stage. For example, for a sequence of four biomarkers a possible sequence is  $S = (2,3,4,1)$ ,

162 which describes a disease progression where the first biomarker abnormality occurs in  
 163 biomarker 2, followed by biomarker 3, then biomarker 4 and finally biomarker 1.

164 With each biomarkers' event states written as  $\neg E$  for normal and  $E$  for abnormal, then  
 165 at a particular stage,  $k$ , of the sequence the events have occurred for  $E_{s(i)}, \dots, E_{s(k)}$  but have  
 166 not yet occurred for  $E_{s(k+1)}, \dots, E_{s(N)}$ . Given independence of biomarker measurements for  
 167 the combination of events at each sequence position, the subjects' probability given the  
 168 sequence and stage,  $k$ , is written as:

$$170 \quad p(X_j|S, k) = \prod_{i=1}^k p(x_{s(i),j} | E_{s(i)}) \prod_{i=k+1}^N p(x_{s(i),j} | \neg E_{s(i)}) \quad (2)$$

171  
 172 Because each subjects' position in the sequence is considered unknown a priori, it is  
 173 marginalised out over each possible position:

$$174 \quad p(X_j|S) = \sum_{k=0}^N p(k)p(X_j|S, k) \quad (3)$$

175  
 176 The prior probability of each position,  $p(k)$ , is assumed to be constant and defined as  
 177  $\frac{1}{N+1}$ , where  $N + 1$  (or equivalently  $|S| + 1$ ) is the number of stages. By substituting Eq. 2 into  
 178 3, then the total likelihood defined in Eq. 1 is written as:

$$179 \quad p(X|S) = \prod_{j=1}^J \left( \sum_{k=0}^N p(k) \left[ \prod_{i=1}^k p(x_{s(i),j} | E_{s(i)}) \prod_{i=k+1}^N p(x_{s(i),j} | \neg E_{s(i)}) \right] \right) \quad (4)$$

180  
 181  
 182 Because the sequence can contain only one biomarker event at each position, it  
 183 cannot represent simultaneous events.

184  
 185 *2.1.3. Simultaneous event-based model: sequence specification and likelihood function*

186 To generalise C-EBM for simultaneous events, the sequence specification is updated  
 187 from an ordered list of biomarker indices to an ordered list of sets. Each set,  $s(i)$ , contains  
 188 one or more biomarker indices corresponding to the events at position  $i$  in the sequence. For  
 189 example, for four biomarkers a sequence containing only serial events is written  $S =$   
 190  $(\{2\}, \{1\}, \{3\}, \{4\})$  and a sequence containing simultaneous events is written  $S =$   
 191  $(\{2\}, \{1, 3\}, \{4\})$ . Given the length of the sequence can vary, the number of positions in the  
 192 sequence is now defined as  $|S| + 1$  instead of  $N + 1$ . Therefore, the prior probability of each

193 position in the sequence is  $p(k; S) = \frac{1}{|S|+1}$  and the likelihood of each subjects' data given  
 194 their position is unknown a priori is written as:

195

$$196 \quad p(X_j|S) = \sum_{k=0}^{|S|} p(k; S)p(X_j|S, k) \quad (5)$$

197

198 As before, the likelihood of each subjects' data given their position  $k$ ,  $p(X_j|S, k)$  is  
 199 the joint probability over the subjects' biomarker values given each biomarkers event state at  
 200 that sequence position. For a position  $k$  in the sequence, the events have occurred for  
 201 biomarkers  $\cup_{1 \leq i \leq k} s(i)$ , whereas the events have not occurred for biomarkers  $\cup_{k < i \leq |S_m|} s(i)$ .  
 202 Hence, the likelihood of each subjects' data given their position is written as:

203

$$204 \quad p(X_j|S, k) = \prod_{\substack{m \in \\ \cup_{1 \leq i \leq k} s(i)}} p(x_{m,j} | E_m) \prod_{\substack{m \in \\ \cup_{k < i \leq |S_m|} s(i)}} p(x_{m,j} | \neg E_m) \quad (6)$$

205

206 By substituting Eq. 6 into 5, then the total likelihood defined by Eq. 1 is written as:

207

$$208 \quad p(X|S) = \prod_{j=1}^J \left( \sum_{k=0}^{|S|} p(k; S) \left[ \prod_{\substack{m \in \\ \cup_{1 \leq i \leq k} s(i)}} p(x_{m,j}|E_m) \prod_{\substack{m \in \\ \cup_{k < i \leq |S_m|} s(i)}} p(x_{m,j}|\neg E_m) \right] \right) \quad (7)$$

209

210

211 This likelihood formulation is a fully generalised form of the C-EBM but can represent  
 212 a wider range of sequence types. In the case of serial events, the likelihood defined in Eq. 7  
 213 becomes equal to the C-EBM likelihood defined in Eq. 4.

214

## 215 2.2. Sequence estimation

### 216 2.2.1. Conventional event-based model

217 In C-EBM (Fonteiijn et al 2012), the sequence is estimated as the characteristic  
 218 ordering of biomarker events, which is the average position of each event following Markov  
 219 Chain Monte Carlo (MCMC) sampling of  $p(S|X)$ . In subsequent work (Young et al 2014), a  
 220 stochastic greedy ascent was used to estimate the maximum likelihood sequence. As we  
 221 aimed to compare the sequence obtained from (Young et al 2014) between C-EBM and S-  
 222 EBM, this is the approach we adopt here.

223 The greedy ascent proceeds by iteratively perturbing the sequence and retaining  
224 those with higher likelihood for some given number of iterations. At each iteration, a  
225 perturbation of the sequence is generated by swapping the positions of two biomarker  
226 events. For example, the if the current sequence is (2, 3, 4, 1), then a perturbed sequence  
227 can be generated by swapping biomarkers 4 and 2, giving the sequence (4, 3, 2, 1). To  
228 prevent dependence of the greedy ascent on the initial random sequence, a number of  
229 initialisations are performed and the sequence with maximum likelihood over all ascents is  
230 the estimated sequence.

231

### 232 2.2.2. Simultaneous event-based model

233 To enable traversal of the full space of sequences that contain any combination of  
234 simultaneous events, we update the sequence perturbation method: a biomarker is chosen  
235 at random and is replaced at any other valid position in the sequence. For example, if the  
236 sequence is ( $\{2\}, \{1, 3\}, \{4\}$ ), then a perturbed sequence can be generated by randomly  
237 choosing biomarker 3 and replacing the biomarker at position 4 in the sequence, giving the  
238 sequence ( $\{2\}, \{1\}, \{4\}, \{3\}$ ). Other possible perturbations are shown in Supplementary Table  
239 1. This perturbation method is compatible with the MCMC sampling method described in  
240 (Fontejn 2012, Young et al 2014), as it retains the property of symmetric transition  
241 probability  $p(S_{t+1}|S_t) = p(S_t|S_{t+1})$ , which simplifies the formulation of the acceptance  
242 probability.

243

### 244 2.3. Event state probability density functions

245 Calculating the sequence likelihood requires the probability density functions of each  
246 biomarker under the condition that the event has or has not occurred,

247  $p(x_{m=1,j}|E_{m=1}), \dots, p(x_{m=N,j}|E_{m=N})$  and  $p(x_{m=1,j}|\neg E_{m=1}), \dots, p(x_{m=N,j}|\neg E_{m=N})$ , respectively.

248 Hypothetically, if each subjects' position in the sequence is known, then the event  
249 state for each biomarker measurement is also known. For example, for a given biomarker  $i$   
250 and its event state  $E_i$ , the probability density function  $p(x_{i,j}|E_i)$  can be fitted to the  
251 measurements  $\{x_{i,j} | k(j) \geq p, s(p) = i\}$  (i.e. the measurements for the subjects at a position  
252 greater or equal to the position of the event for biomarker  $i$ ), where  $k(j)$  is the position in the  
253 sequence of subject  $j$ .

254 However, as the subjects' sequence position is unknown a priori, then the  
255 assumption is made that the measurements are drawn from a mixture distribution  $p(x_{i,j}) =$   
256  $w_i p(x_{i,j}|E_i) + (1 - w_i) p(x_{i,j}|\neg E_i)$ , whose components are then recovered by fitting a mixture  
257 model to all measurements  $\{x_{i,j} | j = 1, \dots, N\}$ .

258



## 259 3. Materials and Methods

### 260 3.1. Simulation experiments

#### 261 3.1.1. Simultaneous event-based forward model

262 A forward model is used in this study to generate biomarker data for simulation  
263 experiments. The model generates data from a given ground truth sequence that can  
264 contain simultaneous events. The required inputs to the forward model are (i) the sequence  
265 (as described in 2.1.3. Simultaneous event-based model: sequence specification and  
266 likelihood function), (ii) the event distributions for each biomarker and (iii) the number of  
267 datapoints (i.e., subjects) to sample.

268 Firstly, a position  $k$ , of the subject within the disease progression sequence is  
269 sampled from the uniform prior distribution  $\text{Unif}\{0, |S|\}$ . The biomarker data for this subject,  
270 indexed by  $j$ , is then generated by sampling from the event distributions corresponding to the  
271 position in the sequence:  $\sim x_{m,j}|E_m$  if  $m \in \cup_{1 \leq i \leq k} s(i)$ , or  $\sim x_{m,j}|\neg E_m$  if  $m \in \cup_{k \leq i \leq |S|} s(i)$ . The  
272 process is then repeated for the specified number of subjects, returning a matrix  $X$  of size  $N$ -  
273 by- $J$  containing the data samples for  $J$  subjects and  $N$  biomarkers.

274

#### 275 3.1.2 Experiment 1: biomarker variance, simultaneous events and C-EBM uncertainty

276 To demonstrate that the uncertainty in event positions derived from C-EBM cannot  
277 be used to infer the presence of simultaneous events, we quantified the effect of both  
278 biomarker variance and simultaneous events on degree of sequence uncertainty. We  
279 hypothesised that both biomarker variance and simultaneous events can separately result in  
280 a high degree of uncertainty in event positions.

281 Data was simulated for two biomarkers sampled from either a serial event sequence  
282 ( $\{1\}, \{2\}$ ), or simultaneous event sequence ( $\{1,2\}$ ), whose probability density functions were  
283 gaussian with a mean of zero for the normal event states (Eqs. 8 and 9) and one for  
284 abnormal event states (Eqs. 10 and 11). Standard deviation was varied from 0.05 to 2.00  
285 and was equal for each biomarker and event state.

286

$$287 \quad p(x_{1,j}|\neg E_1) = \frac{1}{\sigma\sqrt{2\pi}} \exp\left(-\frac{(x_{1,j} - 0)^2}{4\pi^2}\right) \quad (8)$$

$$288 \quad p(x_{2,j}|\neg E_2) = \frac{1}{\sigma\sqrt{2\pi}} \exp\left(-\frac{(x_{2,j} - 0)^2}{4\pi^2}\right) \quad (9)$$

$$289 \quad p(x_{1,j}|E_1) = \frac{1}{\sigma\sqrt{2\pi}} \exp\left(-\frac{(x_{1,j} - 1)^2}{4\pi^2}\right) \quad (10)$$

$$p(x_{2,j}|E_2) = \frac{1}{\sigma\sqrt{2\pi}} \exp\left(-\frac{(x_{2,j} - 1)^2}{4\pi^2}\right) \quad (11)$$

291

292 For each sequence and standard deviation combination, one hundred datasets were  
293 simulated, each with ten ‘control’ subjects at position zero, where no events have yet  
294 occurred, ten ‘end-stage patients’ at the final sequence position  $|S|$ , where all events have  
295 occurred, and twenty ‘intermediate-stage patients’, which are sampled uniformly from the  
296 sequence positions i.e.,  $k \sim \text{Unif}\{0, |S|\}$ . To remove the added variability in positional  
297 uncertainty due to the estimation of event distributions, these distributions were determined  
298 from their simulation definitions.

299 For each simulated dataset, the uncertainty was quantified in a positional variance  
300 matrix,  $P$ , whose  $i, j$ 'th entry gives the probability that biomarker  $i$  is at position  $j$ . This  
301 probability is defined as the frequency over MCMC samples where biomarker  $i$  is at position  
302  $j$  (Fonteiijn et al 2012) i.e.  $P_{i,j} = (\sum_{S \in S_{ij}} 1) / N_{\text{mcmc}}$ , where  $N_{\text{mcmc}}$  is the number of MCMC  
303 samples and  $S_{ij}$  is the set of sequences where biomarker  $i$  is at position  $j$ . In the case of a  
304 serial sequence containing only two biomarkers, this simplifies to  $P_{i,j} = P(X|S_{i@j})$ , where  $S_{i@j}$   
305 refers to the sequence with biomarker  $i$  at position  $j$ . A binary decision was then made as to  
306 whether each positional variance matrix has a significant level of uncertainty or not. A  
307 significant level of uncertainty was defined as the highest probability in the matrix being less  
308 than 0.95, which corresponds to the absence of certainty (with 0.95 probability of higher) in  
309 biomarker positions. The proportion of matrices containing significant levels of uncertainty  
310 for the serial or simultaneous sequences was then plotted as a function of biomarker  
311 standard deviation.

312

### 313 3.1.3. Experiment 2: Evaluation of simultaneous EBM performance

314 We evaluated simultaneous EBM performance against a known ground truth  
315 sequence by quantifying the percentage of correctly estimated sequences over a set of one  
316 hundred simulations of biomarker data. The set of one hundred simulations was repeated for  
317 each combination of sequence type (serial, partially simultaneous and fully simultaneous),  
318 number of biomarkers (2, 4 and 10), number of subjects (40, 80 and 160) and biomarker  
319 variance (s.d.'s of 0.1, 0.2 and 0.3).

320 For each number of subjects, the subject types were split in a 1:2:1 ratio between  
321 control, intermediate and end-stage. As in Experiment 1 (section 3.1.2.), the means of the  
322 event states used to generate the simulated data were zero and one for normal and  
323 abnormal event states, respectively, and the standard deviations were equal for the  
324 biomarker event states for each s.d. value.

325 To sufficiently sample the set of possible sequences during sequence estimation, the  
326 number of initialisations and iterations of the greedy ascent was adjusted for each number of  
327 biomarkers: 1 and 2 respectively for two biomarkers, 10 and 100 respectively for 4  
328 biomarkers, and 50 and 1000 respectively for 10 biomarkers. For all sequence estimations,  
329 the event distributions were fitted using the data from the control and end-stage subjects.

330

#### 331 *3.1.4. Experiment 3: Comparison to conventional EBM for serial events*

332 To evaluate the ability of S-EBM to correctly identify a sequence containing serial  
333 events in the case where C-EBM reports high uncertainty, we quantify the percentage of  
334 correctly estimated sequences as a function of biomarker variance for the range of  
335 biomarker variance that resulted in a high proportion of positional uncertainty, as determined  
336 from section 3.1.2. The simulation conditions are as described in 3.1.2. except with the  
337 sequence estimation being performed by either C-EBM or S-EBM on the serial sequence.

338

### 339 **3.2. Application to Alzheimer's disease progression**

340 We applied S-EBM to sequence the evolution of biomarker abnormalities in AD while  
341 accounting for simultaneous events and compared it to the serial sequence estimated by C-  
342 EBM. Our pipeline for data selection follows that of (Young et al 2014) but utilises existing  
343 sources of pre-compiled AD data.

344

#### 345 *3.2.1. AD biomarker source*

346 Biomarkers of cerebrospinal fluid (CSF) (total tau, phosphorylated tau, amyloid- $\beta_{1-42}$ ),  
347 cognitive test scores (RAVLT, ADAS-Cog, MMSE) and regional brain volumes  
348 (hippocampus, entorhinal cortex, mid-temporal gyrus, fusiform and ventricles) were obtained  
349 from the TADPOLE dataset, which is available for download from the Alzheimer's disease  
350 Neuroimaging Initiative (ADNI) database ([adni.loni.usc.edu](http://adni.loni.usc.edu)) (Mueller et al 2005). TADPOLE  
351 is a pre-compiled source of ADNI biomarker data that includes data from phases 1, GO and  
352 2 of ADNI. TADPOLE datasets D1 and D2, which contain biomarker data from every  
353 individual that has participated in in at least two separate visits, were used in this study. The  
354 image processing steps used by ADNI to generate the biomarkers later compiled in the  
355 TADPOLE dataset are described in 3.2.2. ADNI processing.

356

#### 357 *3.2.2. ADNI processing*

358 CSF measurements of total tau, phosphorylated tau and amyloid- $\beta$  were obtained via  
359 lumbar puncture (Shaw et al 2009). Cognitive test scores were obtained via specialist clinical  
360 assessment (Crane et al 2012). Structural magnetic resonance (MR) images were acquired

361 and underwent pre-processing with standard ADNI pipelines (Jack Jr. et al 2008), which  
362 involved correction for gradient non-linearity, B1 non-uniformity correction and peak  
363 sharpening. Regional volumes were extracted using Freesurfer cross-sectional and  
364 longitudinal pipelines (Reuter et al 2012).

365

### 366 *3.2.3. Biomarker processing*

367 Following (Young et al 2014), we included subjects with available biomarker data  
368 acquired at baseline up to 5<sup>th</sup> February 2013 from those subjects scanned at 1.5T. Brain  
369 volumes were averaged over hemispheres and normalised by intracranial volume to control  
370 for individual differences in head size. CSF total tau and phosphorylated tau were log-  
371 transformed to improve event distribution estimation. Cognitively normal subjects who were  
372 positive for CSF amyloid- $\beta$  (<992 pg/ml) or phosphorylated tau (>25 pg/ml) were removed to  
373 improve the estimation of event distributions, which are presumed to be predominantly  
374 normal in this group.

375

### 376 *3.2.4. Event distributions*

377 For each biomarker, probability density functions corresponding to the event having  
378 occurred or having not occurred, were fitted to the cognitively normal and AD patients'  
379 biomarker data using a constrained gaussian mixture model implemented in MATLAB, as  
380 described in (Young et al 2014). The standard deviations of each event component (E and  
381  $-E$ ) are constrained to be less than or equal to that of the cognitively normal or AD group,  
382 respectively, and the means are constrained to be no less extreme than the cognitively  
383 normal or AD groups. These constraints ensure a robust fit in the case where the  
384 distributions of healthy and patient population overlap significantly.

385

### 386 *3.2.5. Sequencing allowing simultaneous events*

387 The maximum likelihood S-EBM sequence was estimated from 1,000,000 MCMC  
388 samples. MCMC was initialised using the sequence estimated from a greedy ascent  
389 performed with 200 initialisations each with 2,000 iterations.

390

### 391 *3.2.6. Sequencing of serial events*

392 The maximum likelihood C-EBM sequence was estimated using greedy ascent with  
393 200 random initialisations, each with 2,000 iterations. 1,000,000 MCMC samples were taken  
394 to estimate the uncertainty in each biomarkers position.

395

396

## 397 4. Results and Discussion

### 398 4.1. Simulation experiments

#### 399 4.1.1. Experiment 1: biomarker variance, simultaneous events and C-EBM uncertainty

400 A serial sequence with high biomarker variance can produce data which is  
401 interpreted by C-EBM as having high positional uncertainty (Fig. 2, green line). This  
402 uncertainty arises from the relative smoothness of the likelihood function across the  
403 sequence space due to overlapping event probability distributions. However, the same  
404 degree of uncertainty is also apparent in data produced from sequences containing  
405 simultaneous events (Fig. 2, blue line). This many-to-one mapping between sequence  
406 features (biomarker variance, simultaneous events) and positional uncertainty suggests that  
407 the presence of positional uncertainty in a particular dataset does not imply that the  
408 sequence contains simultaneous events. This prevents the use of C-EBM's positional  
409 uncertainty for detecting sequences containing simultaneous events.

410

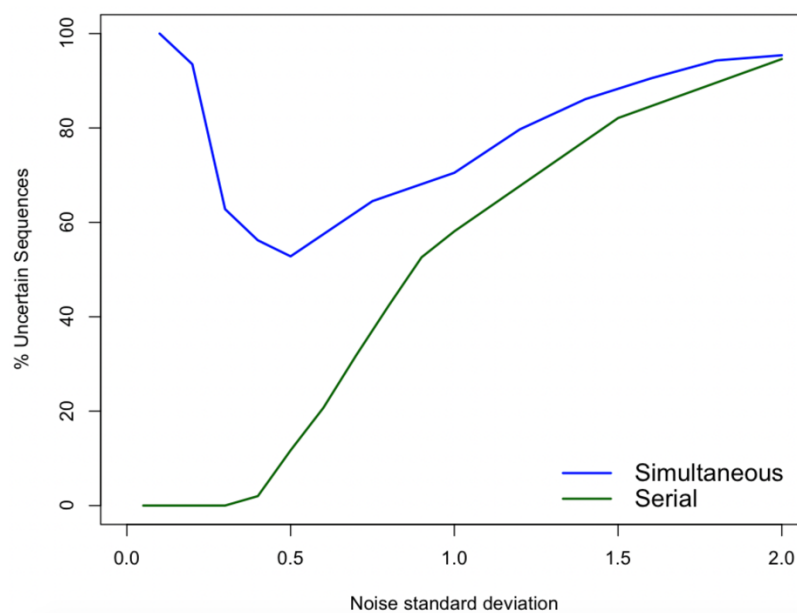

411

412 **Figure 2.** The relation between biomarker standard deviation (x-axis) and uncertainty in the  
413 serial sequence estimated by C-EBM (y-axis) for simultaneous events (blue line) and serial  
414 events (green line). Both high biomarker variance in serial sequences, and sequences  
415 containing simultaneous events, result in a high percentage of uncertain sequences.

416

#### 417 4.1.2. Experiment 2: Evaluation of simultaneous EBM performance

418 S-EBM accurately estimated sequences containing serial events, simultaneous  
419 events or both, under a range of experimental conditions (Fig. 3). Sequence estimation  
420 accuracy was high for sequences of 10 biomarkers and high biomarker variance when a  
421 sufficiently high number of datapoints was sampled. When fewer than 10 datapoints were

422 sampled per sequence position, accuracy tended to decrease for biomarker standard  
 423 deviations exceeding 0.1 for both serial and partially simultaneous sequences. Accuracy  
 424 was high for sequences containing simultaneous events under all conditions.

425 These results suggest that for moderately sized cohorts of individuals, S-EBM will  
 426 produce accurate estimates of sequences containing serial events, simultaneous events or  
 427 both. Given the increasing availability of large prospective and retrospective repositories of  
 428 cross-sectional or short-term longitudinal biomarker data, this technique has the potential to  
 429 inform on disease spread patterns for a range of disease. Of particular interest is using  
 430 retrospective data to provide a refined understanding of disease progression previously  
 431 estimated using C-EBM.

432

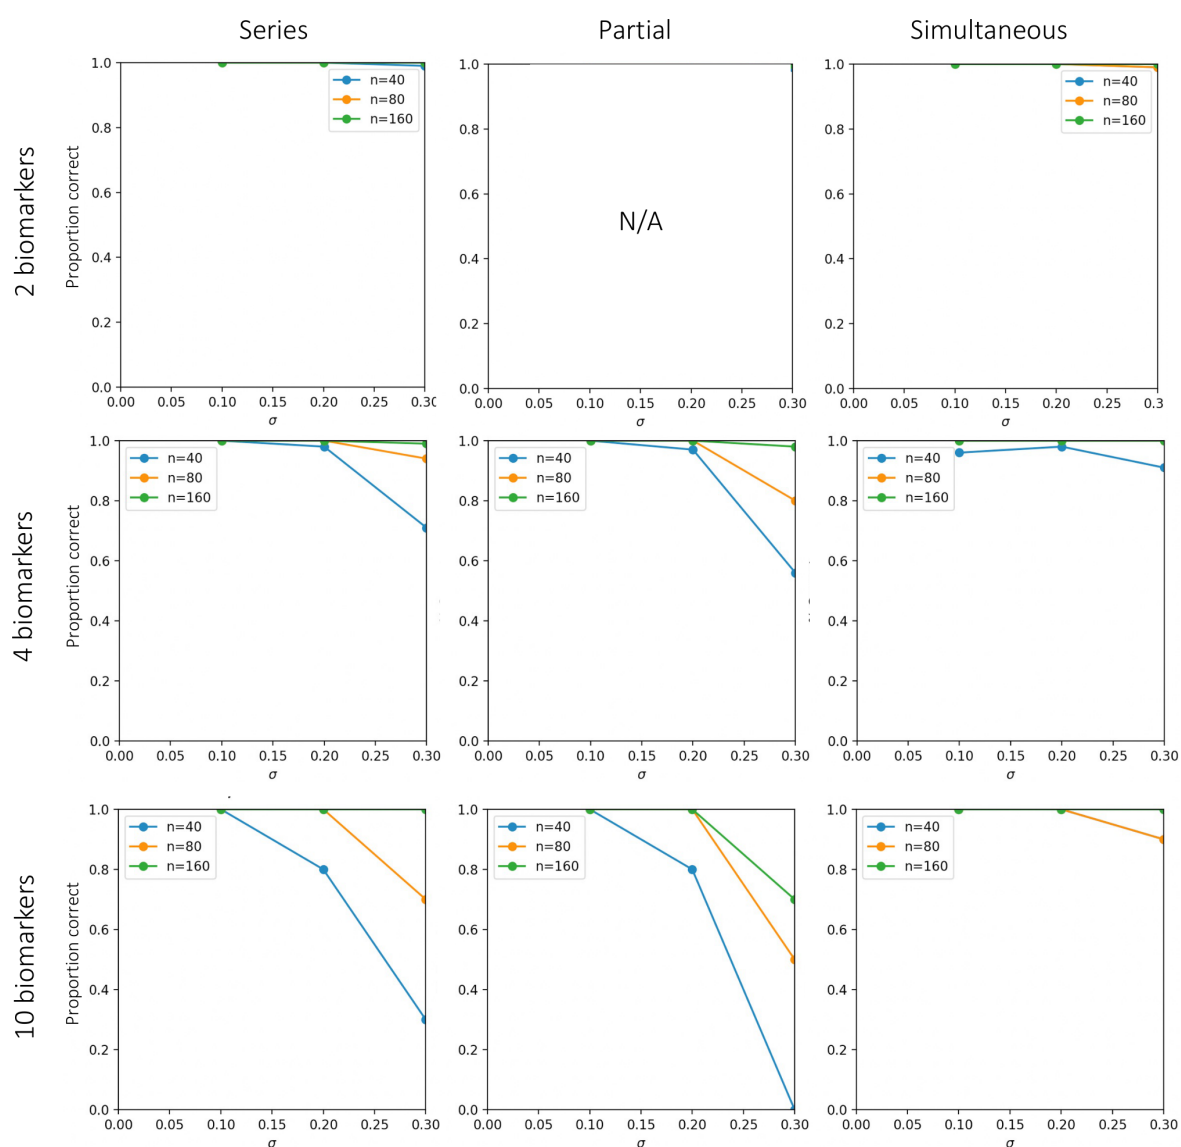

433

434 **Figure 3.** Accuracy of S-EBM sequence estimation for different sequence types (columns),  
 435 numbers of biomarkers (rows), noise standard deviations (x-axis) and number of subjects

436 (coloured lines). Accuracy was high for almost all simulations but tended to decrease with  
437 fewer subjects, higher noise standard deviation and more biomarkers.

438

#### 439 4.1.3. Experiment 3: Comparison to conventional EBM for serial events

440 C-EBM had higher sequence estimation accuracy than S-EBM for noisy serial  
441 sequences which had high C-EBM positional uncertainty (Fig. 4). This suggests that when  
442 C-EBM is uncertain on the positional orderings, its maximum likelihood sequence is  
443 nevertheless more likely to be correct than the maximum likelihood sequence estimated by  
444 S-EBM. This may be expected given that the size of the sequence space of simultaneous  
445 events is greater than that for serial sequences, which leaves more scope for false positives.  
446 Despite this, without a priori knowledge of the sequence type, S-EBM offers the opportunity  
447 to correctly identify a far wider range of types of sequences beyond those restricted by serial  
448 order.

449

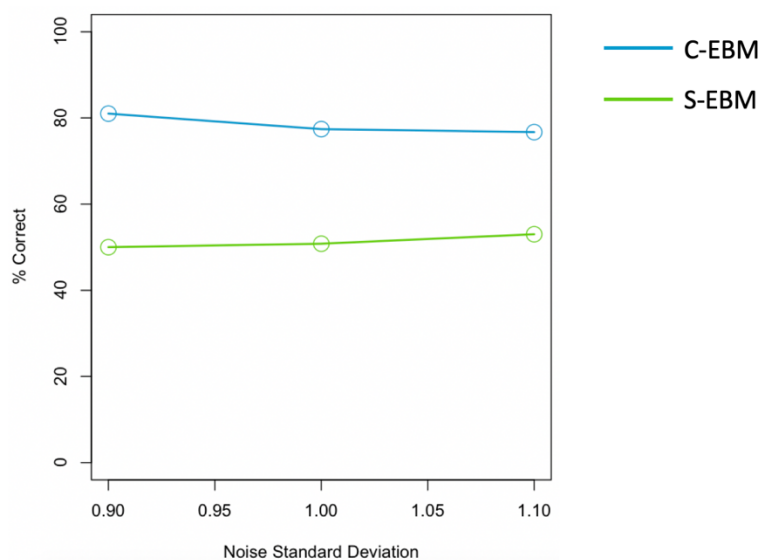

450

451 **Figure 4.** A comparison between C-EBM and S-EBM of serial sequence estimation  
452 accuracy in the case where C-EBM reports high positional uncertainty. In this case C-EBM's  
453 performance is superior to S-EBM due to the smaller sequence search space.

454

455

456

457

458

459

460

461 4.2. Application to Alzheimer’s disease progression

462 4.2.1. S-EBM: estimated sequence allowing simultaneous events

463 The sequence of AD biomarker progression estimated by S-EBM is shown in Fig. 5.  
 464 S-EBM identified a sequence containing simultaneous events which had a substantially  
 465 higher log-likelihood compared to the serial sequence estimated by C-EBM.

466 Simultaneous events were estimated for biomarkers within common biomarker  
 467 marker domains - CSF, cognitive test scores and brain volumes. Increased CSF total tau  
 468 and phosphorylated tau were the first events in the sequence, occurring simultaneously, and  
 469 were followed by high CSF amyloid-β. At disease stage three, low-scoring performance on  
 470 cognitive test scores RAVLT, ADAS-Cog and MMSE were estimated as simultaneous  
 471 events. Following cognitive events, the next disease stage consisted of simultaneous  
 472 volumetric decline in temporal lobe brain regions. The final event in the sequence was  
 473 increased ventricular volume.

474

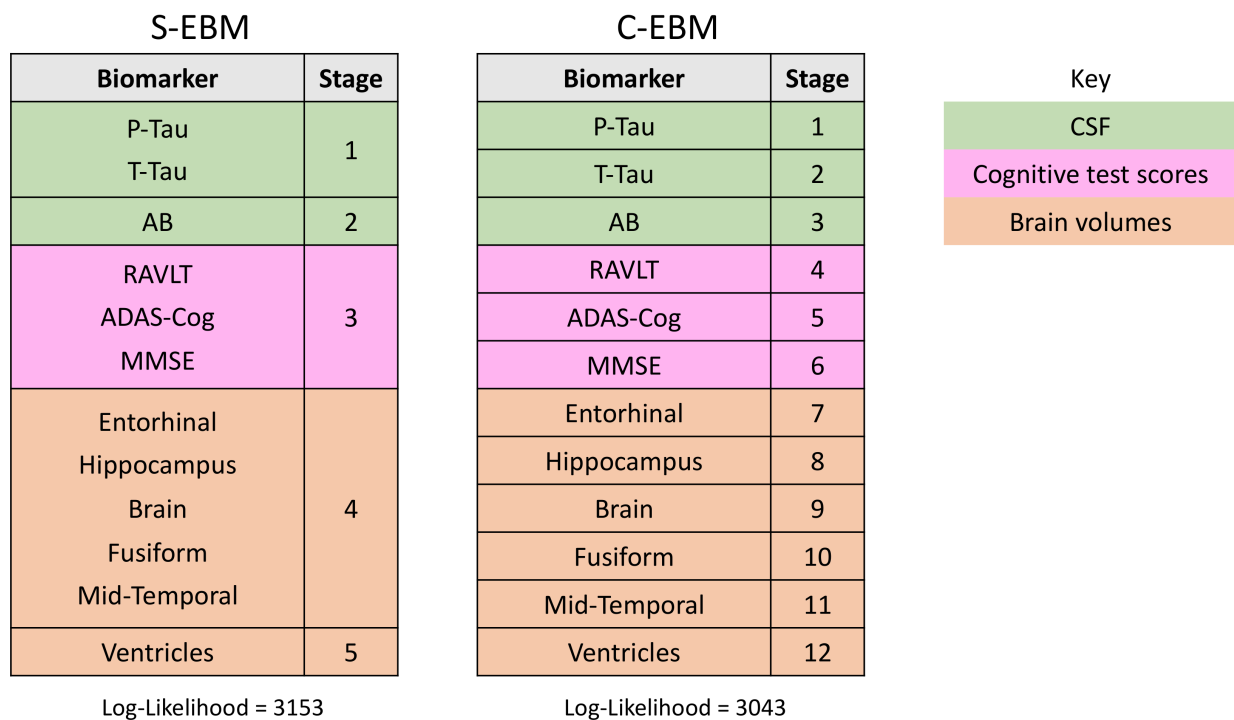

476 **Figure 5.** The sequence of abnormality in biomarkers of CSF, cognitive test scores and  
 477 brain volumes in AD estimated using S-EBM (left) and C-EBM (right). S-EBM estimates a  
 478 sequence with substantially higher log-likelihood than C-EBM, by grouping certain  
 479 biomarkers within domains into the same disease stage. In contrast, S-EBM assumes each  
 480 biomarker abnormality occurs in series.

481

482

483



484 **4.2.2. C-EBM: estimated serial sequence**

485 The serial sequence estimated by C-EBM (Fig. 6) identified a lower log-likelihood  
486 sequence that, by design, assumed all events occur in series. However, it was consistent  
487 with the S-EBM sequence in finding a positional separation between groups of biomarker  
488 events belonging to different biomarker domains.

489 The C-EBM positional variance diagram (Fig. 6) however shows a heterogeneous  
490 distribution of positional uncertainty for the groups of simultaneous events, highlighting that  
491 positional uncertainty cannot be used to infer simultaneous events. Interestingly, interpreting  
492 the blocks of positional uncertainty as simultaneous events derives a sequence ({T-Tau}, {P-  
493 Tau}, {Abeta}, {RAVLT, ADAS-Cog}, {MMSE}, {Entorhinal, Hippocampus}, {Brain, Fusiform,  
494 Mid-Temporal}, {Ventricles}) with lower log-likelihood ( $\log(L)=3108$ ) than that estimated by S-  
495 EBM ( $\log(L)=3153$ ) but which nevertheless more closely matches the data than the serial  
496 sequence estimated by C-EBM ( $\log(L) = 3043$ ).

497 Furthermore, the C-EBM positional uncertainty can be low for groups of  
498 simultaneous events, such as T-Tau and P-Tau, demonstrating that C-EBM can be  
499 confidently incorrect regarding serial event ordering.

500

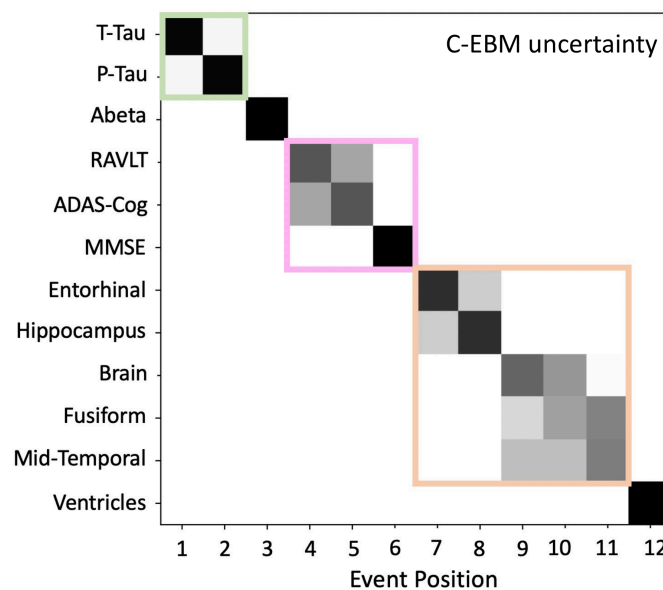

501

502

503 **Figure 6.** Positional variance diagram showing the positional uncertainty in the serial  
504 sequence estimated by C-EBM. Boxes depict the biomarkers grouped into the same stage  
505 by S-EBM. The heterogeneity within boxes indicates that C-EBM uncertainty does not infer  
506 the same information about simultaneous events as S-EBM. Furthermore, C-EBM can be  
507 confidently incorrect regarding serial orderings.

508

509

## 510 **5. Conclusion**

511           This study introduces the simultaneous event-based model. S-EBM is a  
512 generalisation of the conventional event-based model for estimating disease progression  
513 patterns that contain simultaneous events. With moderate sample sizes, S-EBM produces  
514 highly accurate sequence estimates for a range of different sequence types, including serial  
515 sequences, thereby broadening the scope of event-based modelling. By removing the  
516 requirement that the number of disease progression stages correlates linearly with the  
517 number of input biomarkers, the approach suggests a simpler explanation of AD  
518 progression, with biomarker abnormality occurring simultaneously within biomarker domains.  
519 S-EBM may provide new insights into disease evolution and more accurate subject staging,  
520 facilitating the development of therapeutic interventions targeting early disease.

521

522

523

524

525

526

527

528

529

530

531

532

533

534

535

536

537

538

539

540

## 541 **Acknowledgments**

542 CSP, DCA and HZ are supported by the Medical Research Council (MR/T046473/1). CSP is  
543 further supported by the EPSRC CMIC Platform Grant (EP/M020533/1). NPO is a UKRI  
544 Future Leaders Fellow (MR/S03546X/1) and acknowledges funding from the E-DADS  
545 project (EU JPND 2019; UK MRC MR/T046422/1), and the National Institute for Health  
546 Research University College London Hospitals Biomedical Research Centre.

547

## 548 **6. References**

- 549 1. Braak, H. and Braak, E. 1991. Neuropathological staging of Alzheimer-related  
550 changes. *Acta neuropathologica*, 82(4)
- 551 2. Crane, P.K., Carle, A., Gibbons, L.E., Insel, P., Mackin, R.S., Gross, A., Jones, R.N.,  
552 Mukherjee, S., Curtis, S.M., Harvey, D. and Weiner, M. 2012. Development and assessment  
553 of a composite score for memory in the Alzheimer's Disease Neuroimaging Initiative (ADNI).  
554 *Brain imaging and behavior*, 6(4)
- 555 3. Eshaghi, A., Marinescu, R.V., Young, A.L., Firth, N.C., Prados, F., Jorge Cardoso, M., Tur,  
556 C., De Angelis, F., Cawley, N., Brownlee, W.J. and De Stefano, N. 2018. Progression of  
557 regional grey matter atrophy in multiple sclerosis. *Brain*, 141(6)
- 558 4. Fonteijn, H.M., Modat, M., Clarkson, M.J., Barnes, J., Lehmann, M., Hobbs, N.Z., Scahill,  
559 R.I., Tabrizi, S.J., Ourselin, S., Fox, N.C. and Alexander, D.C. 2012. An event-based model  
560 for disease progression and its application in familial Alzheimer's disease and Huntington's  
561 disease. *NeuroImage*, 60(3)
- 562 5. Gabel, M.C., Broad, R.J., Young, A.L., Abrahams, S., Bastin, M.E., Menke, R.A., Al-Chalabi,  
563 A., Goldstein, L.H., Tsermentseli, S., Alexander, D.C. and Turner, M.R. 2020. Evolution of  
564 white matter damage in amyotrophic lateral sclerosis. *Annals of clinical and translational  
565 neurology*, 7(5)
- 566 6. Jack Jr, C.R., Bernstein, M.A., Fox, N.C., Thompson, P., Alexander, G., Harvey, D.,  
567 Borowski, B., Britson, P.J., L. Whitwell, J., Ward, C. and Dale, A.M. 2008. The Alzheimer's  
568 disease neuroimaging initiative (ADNI): MRI methods. *Journal of Magnetic Resonance  
569 Imaging: An Official Journal of the International Society for Magnetic Resonance in Medicine*,  
570 27(4)
- 571 7. Jack Jr, C.R., Knopman, D.S., Jagust, W.J., Shaw, L.M., Aisen, P.S., Weiner, M.W.,  
572 Petersen, R.C. and Trojanowski, J.Q. 2010. Hypothetical model of dynamic biomarkers of the  
573 Alzheimer's pathological cascade. *The Lancet Neurology*, 9(1)), 119-128
- 574 8. Marinescu, R.V., Oxtoby, N.P., Young, A.L., Bron, E.E., Toga, A.W., Weiner, M.W., Barkhof,  
575 F., Fox, N.C., Klein, S. and Alexander, D.C. 2018. Tadpole challenge: Prediction of  
576 longitudinal evolution in Alzheimer's disease. arXiv preprint arXiv:1805.03909.

- 577 9. Mueller, S.G., Weiner, M.W., Thal, L.J., Petersen, R.C., Jack, C.R., Jagust, W., Trojanowski,  
578 J.Q., Toga, A.W. and Beckett, L. 2005. Ways toward an early diagnosis in Alzheimer's  
579 disease: the Alzheimer's Disease Neuroimaging Initiative (ADNI). *Alzheimer's &*  
580 *Dementia*, 1(1)
- 581 10. Reuter, M., Schmansky, N.J., Rosas, H.D. and Fischl, B. 2012. Within-subject template  
582 estimation for unbiased longitudinal image analysis. *Neuroimage*, 61(4)
- 583 11. Shaw, L.M., Vanderstichele, H., Knapik-Czajka, M., Clark, C.M., Aisen, P.S., Petersen, R.C.,  
584 Blennow, K., Soares, H., Simon, A., Lewczuk, P. and Dean, R. 2009. Cerebrospinal fluid  
585 biomarker signature in Alzheimer's disease neuroimaging initiative subjects. *Annals of*  
586 *neurology*, 65(4)
- 587 12. Wijeratne, P.A., Young, A.L., Oxtoby, N.P., Marinescu, R.V., Firth, N.C., Johnson, E.B.,  
588 Mohan, A., Sampaio, C., Scahill, R.I., Tabrizi, S.J. and Alexander, D.C. 2018. An image-  
589 based model of brain volume biomarker changes in Huntington's disease. *Annals of clinical*  
590 *and translational neurology*, 5(5)
- 591 13. Young, A.L., Oxtoby, N.P., Daga, P., Cash, D.M., Fox, N.C., Ourselein, S., Schott, J.M. and  
592 Alexander, D.C., 2014. A data-driven model of biomarker changes in sporadic Alzheimer's  
593 disease. *Brain*, 137(9)
- 594
- 595
- 596
- 597
